# Supplementary material for: Preparation, properties and in vivo pharmacokinetic study of drug vesicles composed of diphenhydramine and AOT
Source: Royal Society of Chemistry journal article supplement (doi:10.1039/c4ra09294e), 2014-11-19
Supplement: c4ra09294e1.pdf [file c4ra09294e1.pdf]

**Supporting Information For**  
**Preparation, properties and *in vivo* pharmacokinetic study of drug**  
**vesicles composed of diphenhydramine and AOT**

Xiaoqing Ji,<sup>a</sup> Chunhuan Shi,<sup>a</sup> Lisi Qi,<sup>a</sup> Yuanyuan Guo,<sup>b</sup> Nuannuan Li,<sup>a</sup> Zhonghao Li<sup>b</sup>  
and Yuxia Luan<sup>a\*</sup>

<sup>a</sup>School of Pharmaceutical Science and Center for Pharmaceutical Research & Drug Delivery Systems, Shandong University, 44 West Wenhua Road, Jinan, Shandong Province, 250012, P. R. China. E-mail: yuxialuan@sdu.edu.cn.

<sup>b</sup>Key Laboratory of Colloid and Interface Chemistry, Shandong University, Ministry of Education, Jinan, Shandong Province, 250100, P.R. China.

**Scheme S1** Molecular structures of AOT and DH.

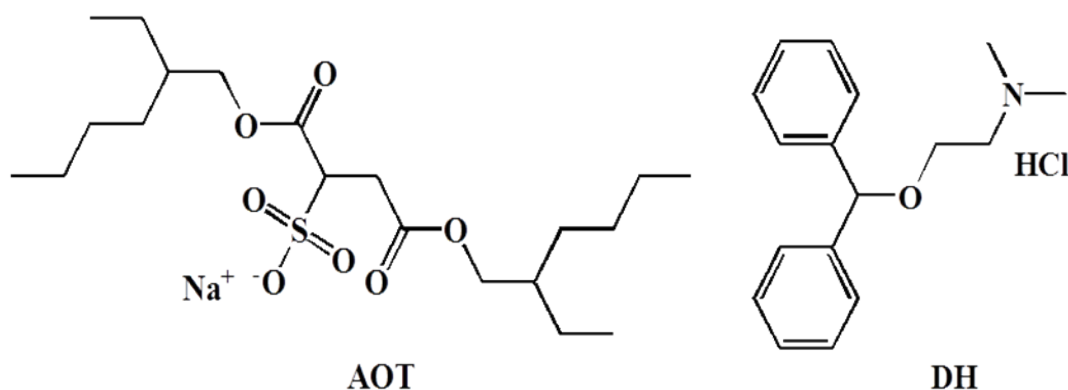

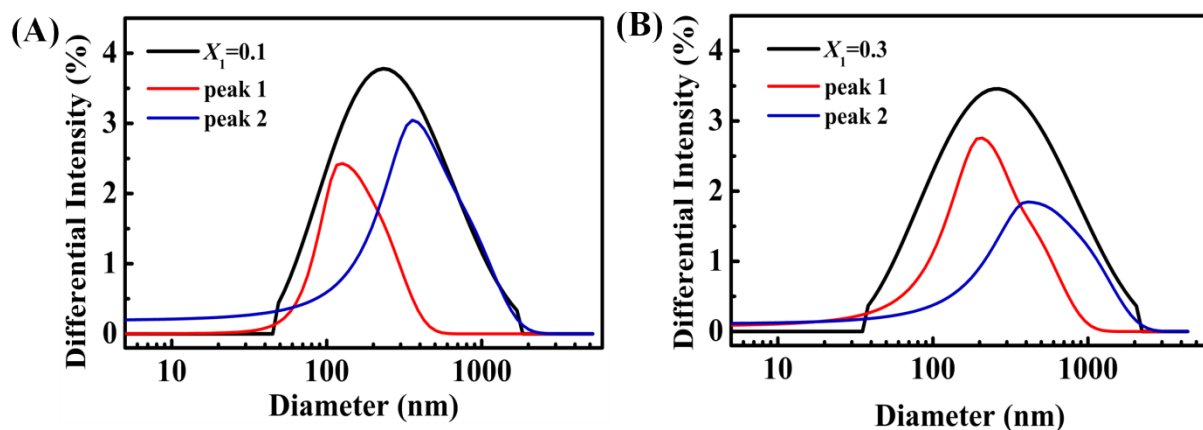

**Fig. S1** Peak fitting to Hydrodynamic diameter ( $D_h$ ) distributions of the samples at  $X_I=0.1$  (A) and  $X_I=0.3$  (B).

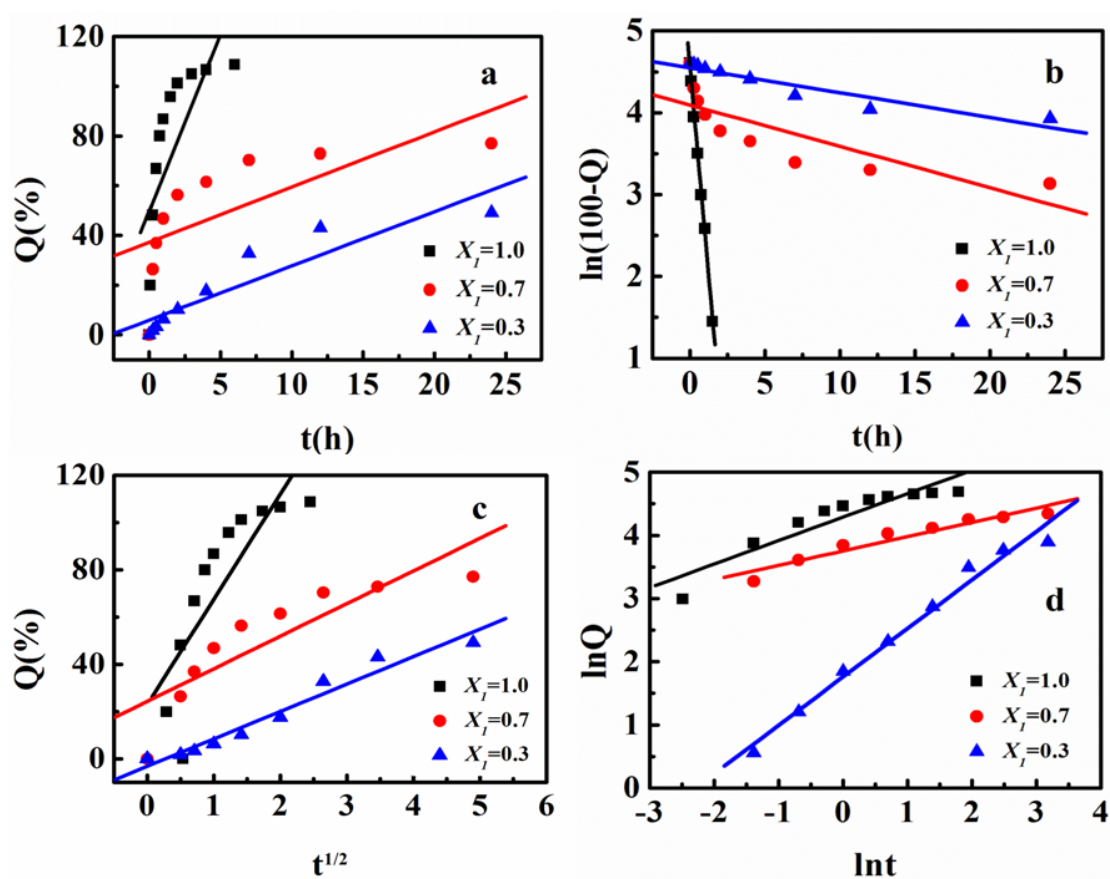

**Fig. S2** Linear fitting of various models to the release of DH from different samples in a phosphate buffer at pH 7.4. Fits by (a) zero-order model, (b) first-order model, (c) Higuchi model, (d) Ritger-Peppas model
